# Supplementary material
Source: MDPI journal article supplement (https://www.mdpi.com/2504-477X/6/1/19)
Supplement: s1 [file s1 › jcs-1522684-supplementary.pdf]

# Supporting Information: Integrating Soft Hydrogel with Nanostructures Reinforces Stem Cell Adhesion and Differentiation

Bohan Yin <sup>1</sup>, Hongrong Yang <sup>2</sup> and Mo Yang <sup>1,\*</sup>

<sup>1</sup> Department of Biomedical Engineering, The Hong Kong Polytechnic University, Hong Kong 999077, China; bohanyin93@gmail.com

<sup>2</sup> Department of Bioengineering, College of Engineering, Northeastern University, Boston, MA 02115, USA; donnayeung0722@gmail.com

\* Correspondence: mo.yang@polyu.edu.hk; Tel.: +852-2766-4946

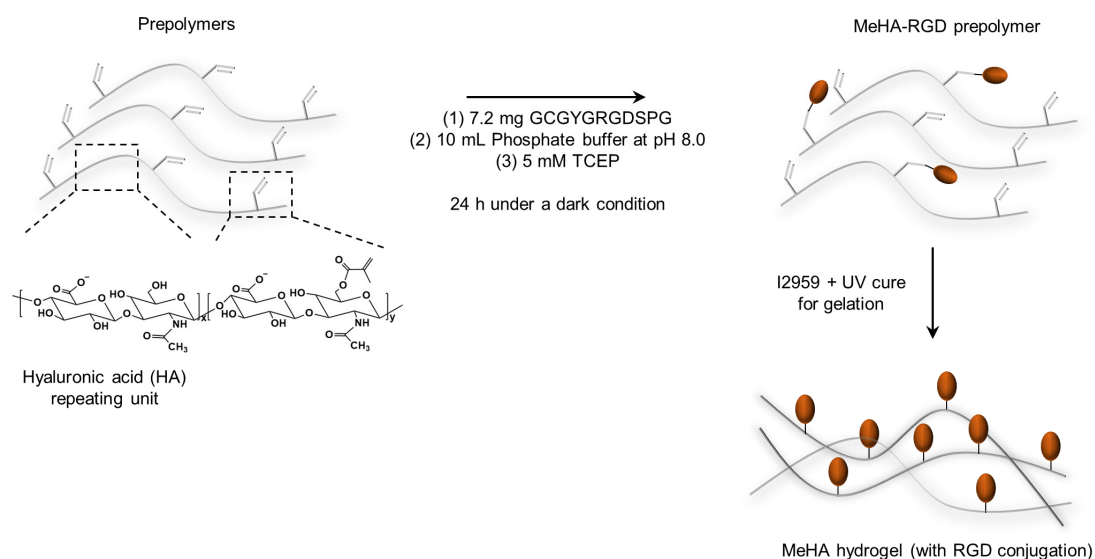

**Figure S1.** Synthetic route of RGD-coupled methacrylated hyaluronic acid (MeHA) hydrogel.

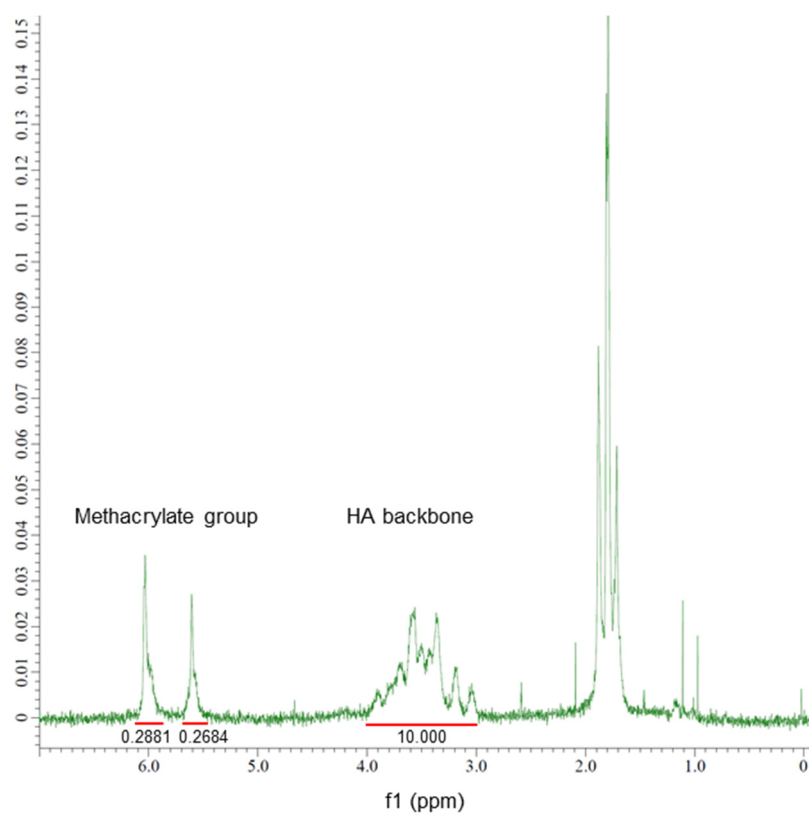

**Figure S2.**  $^1\text{H}$  NMR spectra of the methacrylated hyaluronic acid (MeHA). The integration of the spectrum shows that methacrylation degree is ~30%, confirming the successful methacrylation in this study.

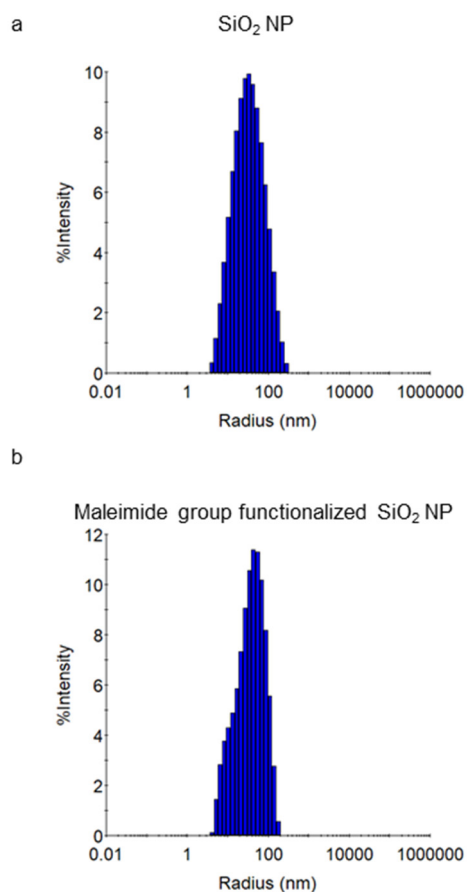

**Figure S3.** Dynamic light scattering (DLS) characterization for the size of (a) SiO NPs, (b) maleimide group functionalized SiO<sub>2</sub> NPs. The average hydrodynamic measured diameters of (a) and (b) were  $31.4 \pm 2.5$  nm and  $39.5 \pm 5.4$  nm, respectively.

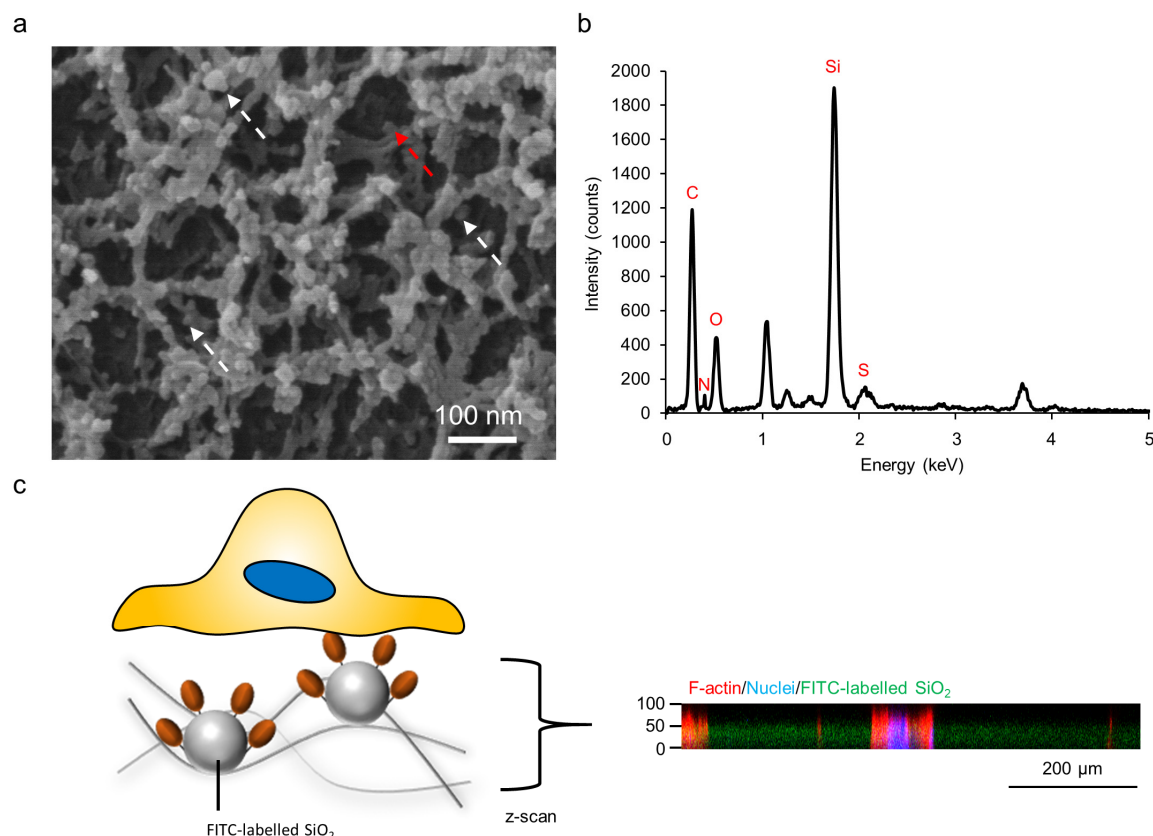

**Figure S4.** Exploration of immobilized SiO<sub>2</sub> NPs in MeHA hydrogel network. (a) Magnified SEM image of MeHA-SiO<sub>2</sub> hydrogel. White arrows indicate the immobilized SiO<sub>2</sub> NPs distributed throughout different layers of MeHA hydrogel. (b) EDS spectrum from red arrow in (a), indicating high content of SiO<sub>2</sub> inside the MeHA network. (c) Cells cultured on MeHA-SiO<sub>2</sub> hydrogel where SiO<sub>2</sub> NPs were labelled with FITC. The right panel shows the z-axis stacking images of the FITC-labelled SiO<sub>2</sub> (green) conjugated on MeHA hydrogel, with the presence of cells cultured on the hydrogel (6 h of cell culture). The cells were also stained with F-actin (red) and nuclei (blue).

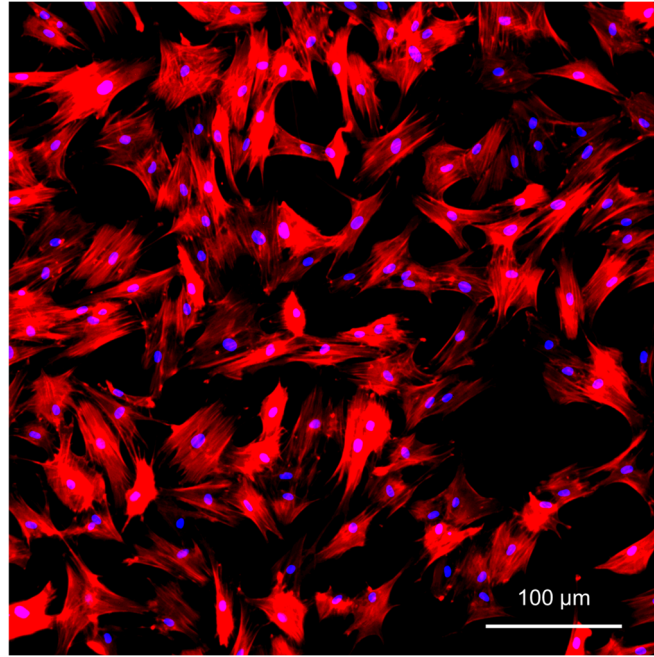

**Figure S5.** Cells cultured on a glass substrate were considered as a positive control group as the cells spread well on it. The spreading area was  $5841 \pm 518 \mu\text{m}^2$ .

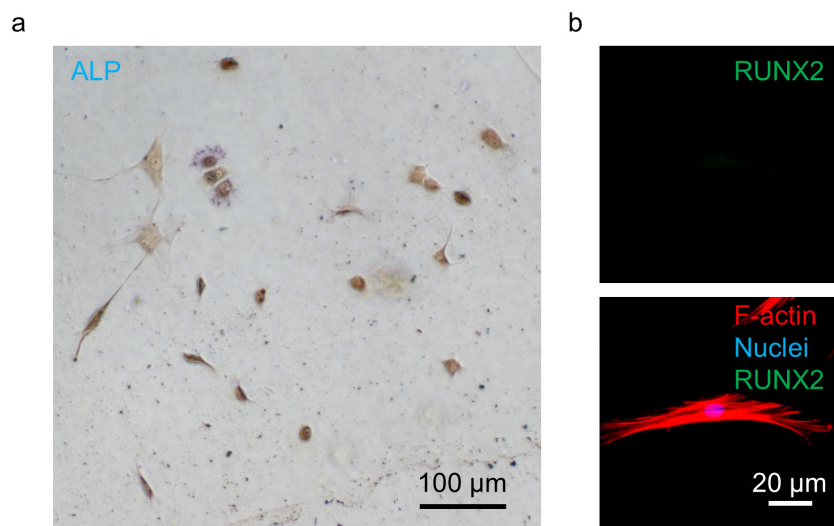

**Figure S6.** Examination of the expression level of ALP and RUNX2, the early-stage markers of osteogenic differentiation of stem cells, in hMSCs without the osteogenic medium by immunostaining on MeHA hydrogel (with RGD conjugation). (a) ALP staining result. There were only  $8.41 \pm 2.13$  % of positively stained cells for expressing ALP. (b) Immunostaining result RUNX2 (green) merging with F-actin and nuclei staining. The nuclear localization ratio of RUNX2 was  $0.37 \pm 0.82$  in the cells. These results suggest that undifferentiated hMSCs show minimal basal expression of these two markers.
